# Supplementary material for: A thermally responsive cationic nanogel-based platform for three-dimensional cell culture and recovery
Source: Royal Society of Chemistry journal article supplement (doi:10.1039/c4ra02852j), 2014-06-09
Supplement: c4ra02852j1.pdf [file c4ra02852j1.pdf]

Supporting Information

**A thermal responsive cationic nanogel based platform for cell three-  
dimensional culture and recovery**

Zheyu Shen, Amir Mellati, Jingxiu Bi, Hu Zhang\* and Sheng Dai\*

*School of Chemical Engineering, The University of Adelaide, Adelaide SA5005,  
Australia*

\*Corresponding authors.

E-mail: s.dai@adelaide.edu.au (S. Dai) or hu.zhang@adelaide.edu.au (H. Zhang).

Fax: + 61 8 8313 4373

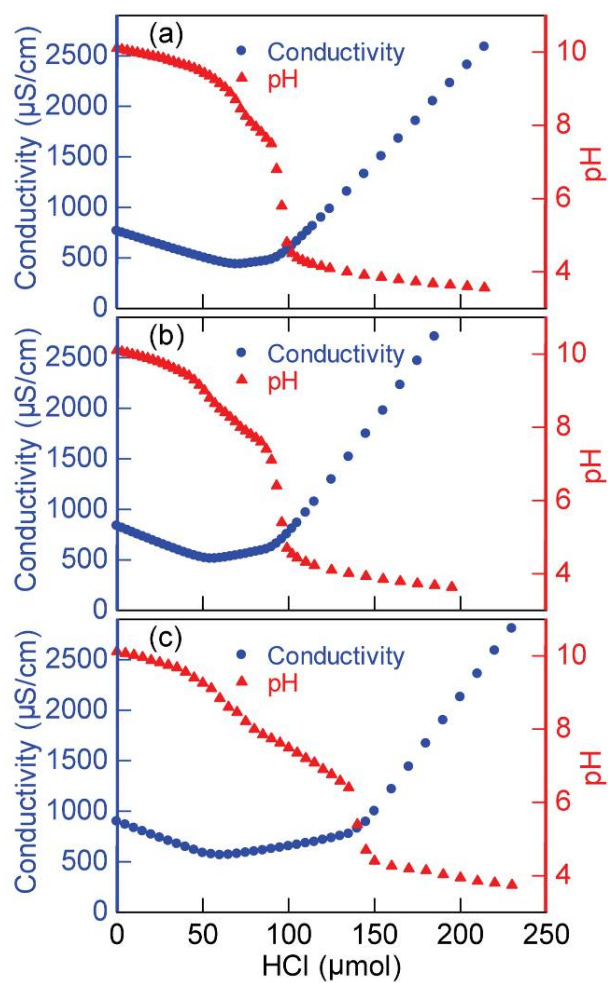

**Figure S1.** Conductivity and pH titrations of the PNHD nanogels. (a): PNHD1; (b): PNHD2; (c): PNHD3.

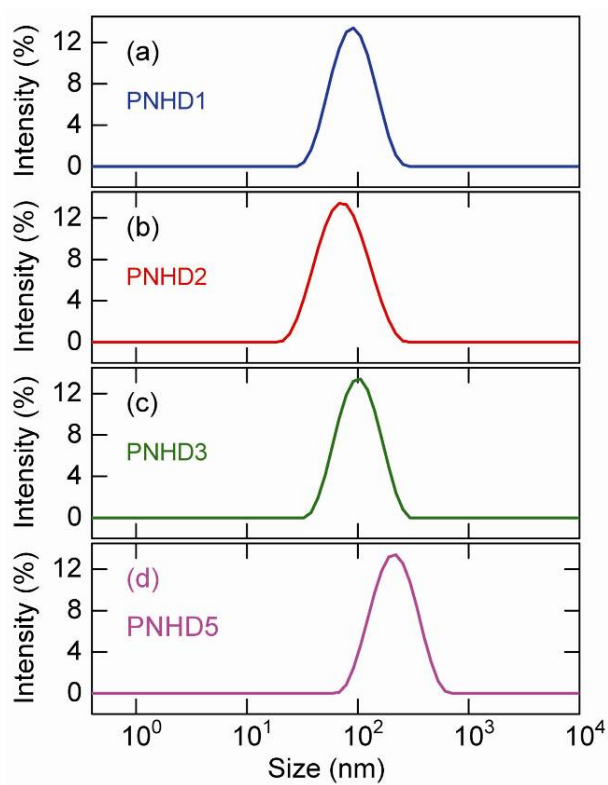

**Figure S2.** Hydrodynamic size distributions of the PNHD nanogels measured by dynamic light scattering (DLS) in water ( $C \sim 1.0$  mg/mL, pH  $\sim 7.0$ ) at 25 °C. (a): PNHD1; (b): PNHD2; (c): PNHD3; (d): PNHD5.

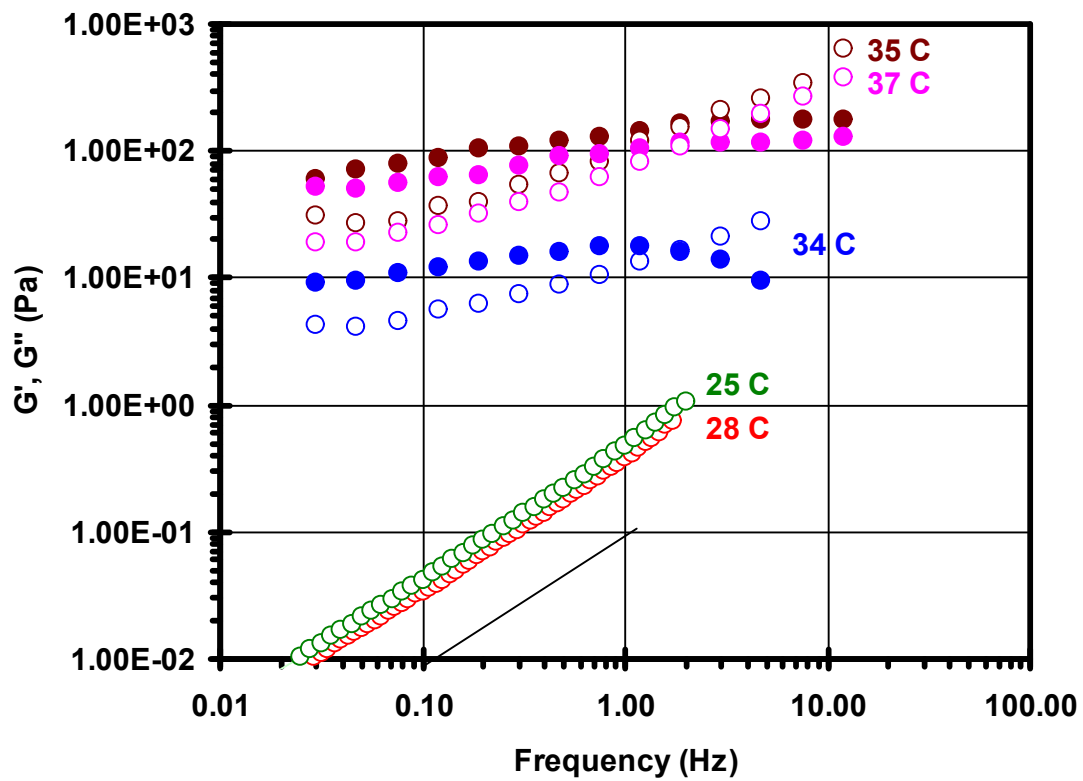

**Figure S3.** Frequency sweeps of 50 mg/ml PNHD nanogels at different temperatures. The open symbols are  $G''$  and closed symbols are  $G'$ .

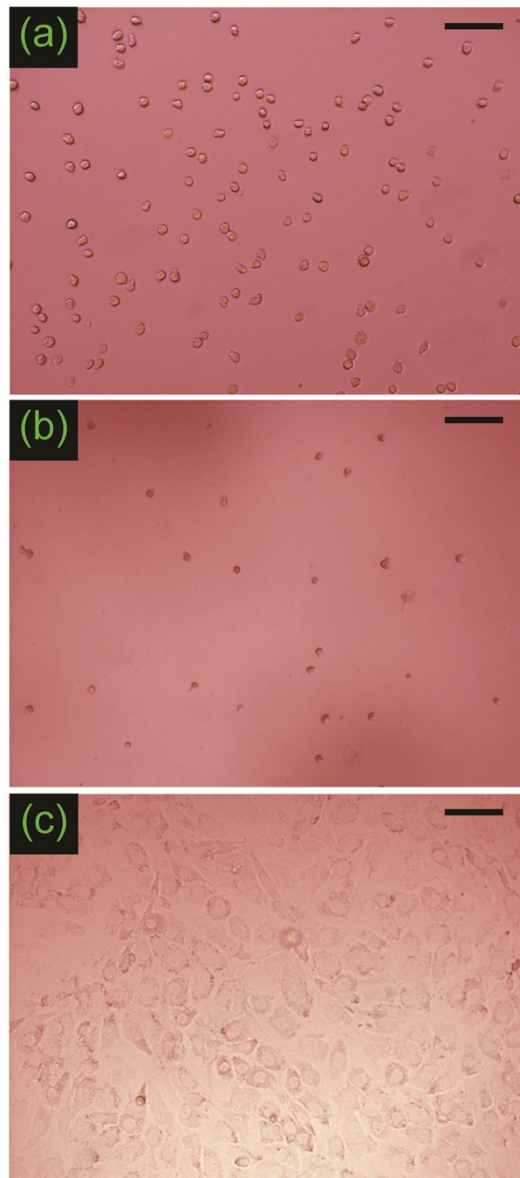

**Figure S4.** (a): Image of trypsinized adherent C3H/10T1/2 cells as the reference of cell size. (b): Image of C3H/10T1/2 cells cultured in the *in situ* formed PNHD1 hydrogel for 6 days; the cultured cells were recovered from the hydrogels by cooling the culturing system to room temperature. (c): Image of the attached C3H/10T1/2 cells (released from the *in situ* formed PNHD1 hydrogel) to a 2D substrate. Scale bar: 50  $\mu\text{m}$ .
